# Supplementary material for: An Antibody-Deficiency Syndrome Due to Mutations in theCD19Gene
Source: Atypon-hosted journal article supplement (doi:10.1056/nejmoa051568), 2006-05-03
Supplement: nejm_vanzelm_1901sa1.pdf [file nejm_vanzelm_1901sa1.pdf]

## Supplementary Appendix

This appendix has been provided by the authors to give readers additional information about their work.

Supplement to: van Zelm MC, Reisli I, van der Burg M, et al. An antibody-deficiency syndrome due to mutations in the *CD19* gene. N Engl J Med 2006;354:1901-12.

**Supplement A.** PCR primers for amplification and sequencing of *CD19* coding regions from genomic DNA

| Exon(s) | Forward primer | Forward primer sequence | Reverse primer | Reverse primer sequence  |
|---------|----------------|-------------------------|----------------|--------------------------|
| 1       | CD19exonF1     | CCTGCCTGCCCCAGCATC      | CD19exonR1     | GGACACCCAGCCACAACCTCAAG  |
| 2       | CD19exonF2     | CATGCCACACCTCTCTCCCTC   | CD19exonR2     | GTGGCCTCCCTTCTCTCCTCCT   |
| 3       | CD19exonF3     | GGGTGTCTCTGCATTTGGTTCT  | CD19exonR3     | GTTTCCCCTCCCCTCTGTCTCT   |
| 4       | CD19exonF4     | CAGAGACAGAGGGGAGGGGAAA  | CD19exonR4     | GGAGTCAGTGTTCTGTGTGGAAGT |
| 5       | CD19exonF5     | CCTGGGGTCCTCGTCTCATA    | CD19exonR5     | GGGAAGATGGAGTAGGGTTT     |
| 6       | CD19exonF6     | CCTGCCAAGCAGCCCCTC      | CD19exonR6     | CAAGGCATAAAGTGAAGGTGGA   |
| 7       | CD19exonF7     | GGCCTGGACAGAATCTTGAGTG  | CD19exonR7     | CACAGCGGATTGGAGGGATGA    |
| 8       | CD19exonF8     | CATCTCTTCTGACCCCGTCTTA  | CD19exonR8     | ATGGGGATGGGGAACCGAGT     |
| 9+10    | CD19exonF9+10  | GTCTGTGGCCCGAATAGTG     | CD19exonR9+10  | CGCTGCAATTACACCTAAGTCTC  |
| 11+12   | CD19exonF11+12 | GCGCTGTGACACTCCTAGAA    | CD19exonR11+12 | GGGTCAGGGTCAGGTCAAAGTT   |
| 13+14   | CD19exonF13+14 | CCTCTGCCCTCAGTCTTCCTC   | CD19exonR13+14 | CTGCCATCCGTGCCTATCT      |
| 15      | CD19exonF15    | GTTCTAGGGCCTGGTGG       | CD19exonR15    | ATTCAAGACGCCTTTCCTTCC    |

**Supplement B. PCR primers and TaqMan probe for quantification of *CD19* transcripts**

| Primer                 | Name      | Sequence             |
|------------------------|-----------|----------------------|
| Forward primer         | CD19 RQ F | CGTGGCAACCTGACCATGT  |
| Reverse primer         | CD19 RQ R | CCACAAGGGAACACAGGCAG |
| TaqMan FAM-TAMRA probe | Tr-CD19   | ACCAGTCCTCAGCAGCCAGT |
